# Supplementary material
Source: publisher figshare collection journal article supplement (https://acs.figshare.com/ndownloader/files/31023733)
Supplement: Supplementary file 1 [file 31023733]

# SUPPORTING INFORMATION

## **Long-Range Electron Transfer through Ultrathin Polyelectrolyte Complex Films: a Hopping Model**

*Samir Abou Shaheen, Rachel L. Abbett, Khalil Akkaoui, and Joseph B. Schlenoff\**

Department of Chemistry and Biochemistry

The Florida State University

Tallahassee, FL 32308 USA

E-mail: [schlen@chem.fsu.edu](mailto:schlen@chem.fsu.edu)

### *PSS molar absorptivity*

To determine the concentration of the labeled PSS, the molar absorptivity of narrow MWD PSS was measured. The analysis of the absorbances at  $\lambda = 225$  nm of a series of PSS solutions prepared by the dilution of a  $24 \times 10^{-5}$  M stock yielded a molar extinction coefficient of  $9,361 \text{ M}^{-1} \text{ cm}^{-1}$  (Figure S1). Using this  $\epsilon$  value, the molar concentration of the labeled PSS was determined to be 0.57 mM and this concentration was used to build up the labeled and unlabeled PEMUs.

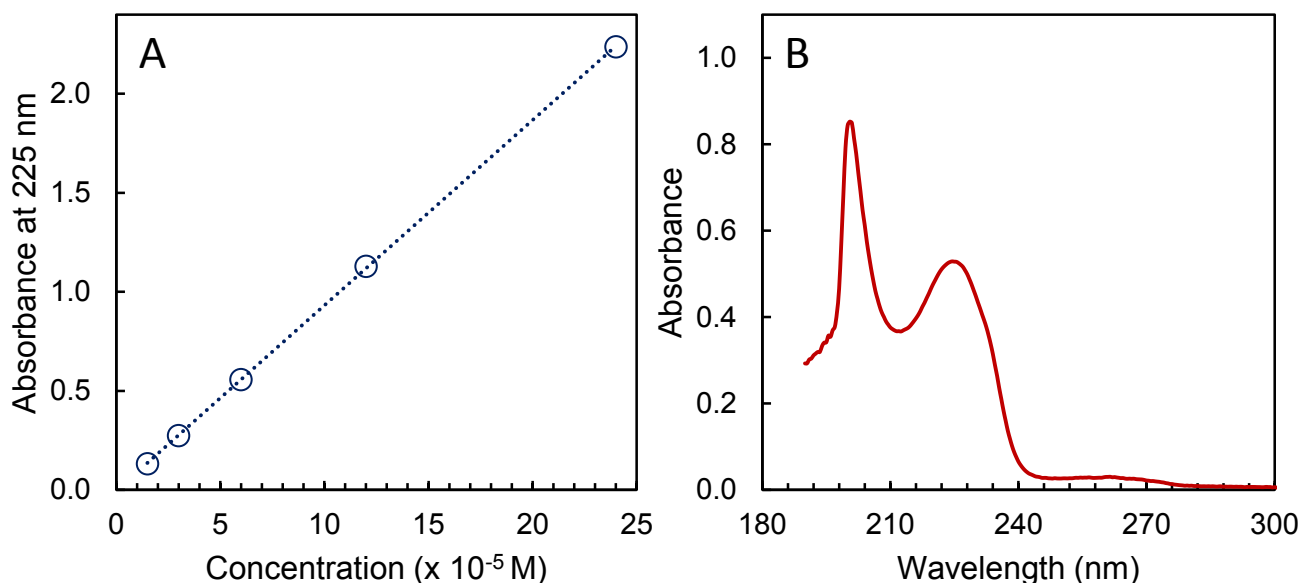

**Figure S1.** A) The absorbance of narrow MWD PSS at  $\lambda = 225$  nm as a function of concentration. The extinction coefficient at this wavelength is  $9,361 \text{ M}^{-1} \text{ cm}^{-1}$  from the slope of the line. B) Absorbance of labeled PSS solution.

### PEMU thickness on Pt

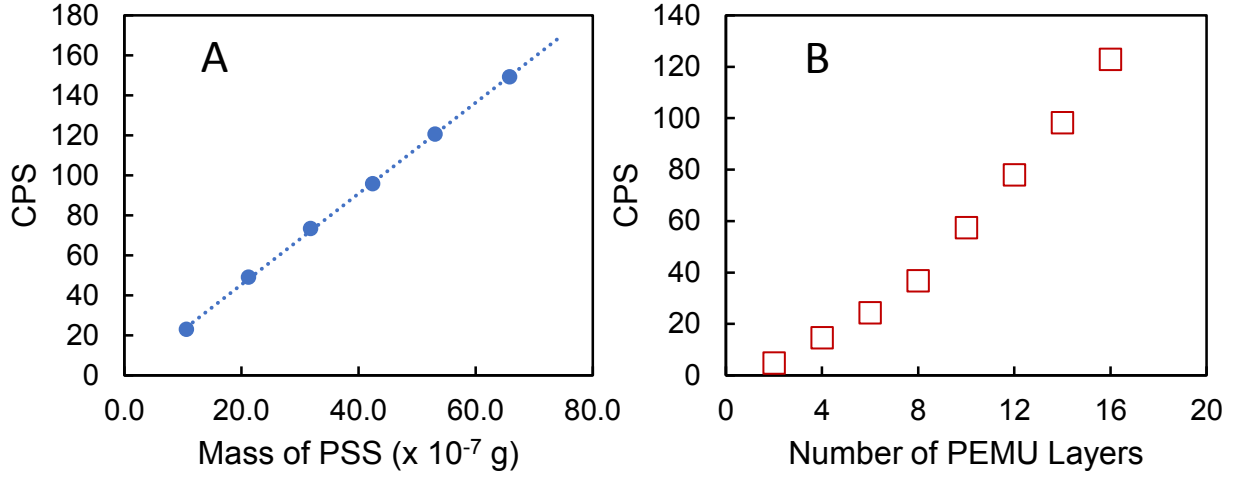

**Figure S2.** A) Calibration curve showing the counts per second, CPS, as a function of the mass of PSS. B) Raw data for the background corrected CPS vs. number of layers

The thickness  $d$  (nm) of each PEMU bilayer was calculated using

$$d = \frac{\frac{M_{PDAD/PSS}}{M_{PSS}} \times m}{A\rho} \times \frac{10^7 \text{ nm}}{\text{cm}} \quad [\text{S1}]$$

Where  $\frac{M_{PDAD/PSS}}{M_{PSS}}$  is the ratio of molecular weights of the PDADMA/PSS complex to PSS = 1.67,  $m$  is the mass of the PSS (g),  $A$  is the area (cm<sup>2</sup>) and  $\rho$  is the density of the PDADMA/PSS complex (1.26 g cm<sup>-3</sup>).

Assuming the water content is 40 wt% in a wet PDADMA/PSS film, the wet thickness would be:

$$d_{\text{wet}} = \frac{100 \times \rho_{\text{dry}}}{60 \times \rho_{\text{wet}}} \times d_{\text{dry}}$$

$$d_{\text{wet}} = \frac{100 \times 1.26 \text{ g mL}^{-1}}{60 \times 1.15 \text{ g mL}^{-1}} \times d_{\text{dry}}$$

$$d_{wet} = 1.8 \times d_{dry} \quad [S2]$$

where  $\rho_{dry}$  and  $\rho_{wet}$  are the densities ( $\text{g cm}^{-3}$ ) of the dry and wet PDADMA/PSS films respectively and  $d_{dry}$  (nm) is the effective dry thickness of the film.

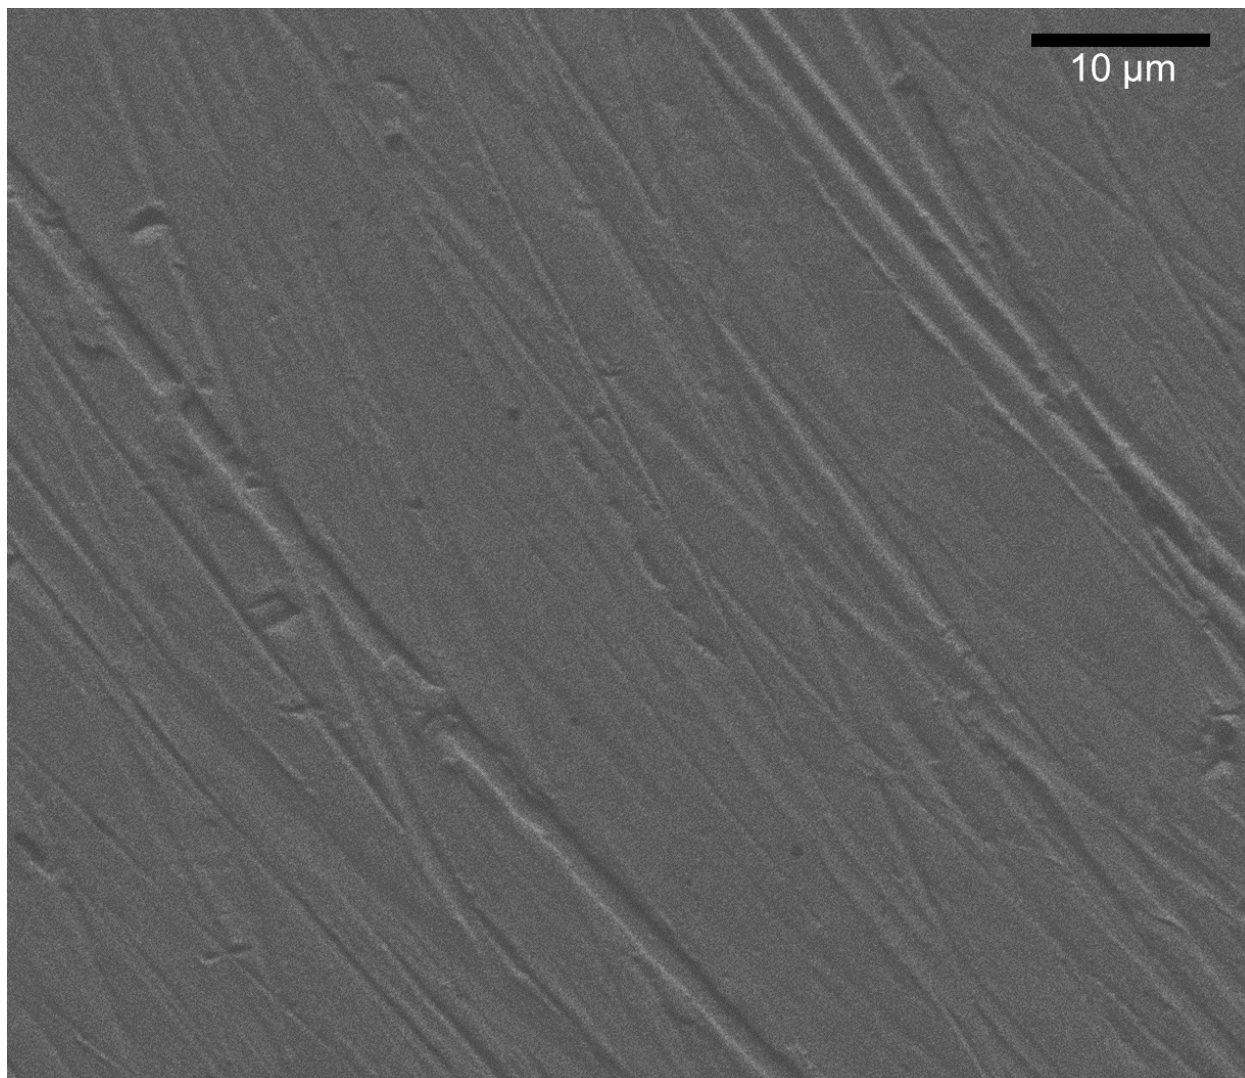

**Figure S3.** Scanning electron microscopy image of a bare Pt RDE previously polished with 0.3  $\mu\text{m}$  alumina, sonicated for 15 s, rinsed with deionized water, and dried under a stream of  $\text{N}_2$ .

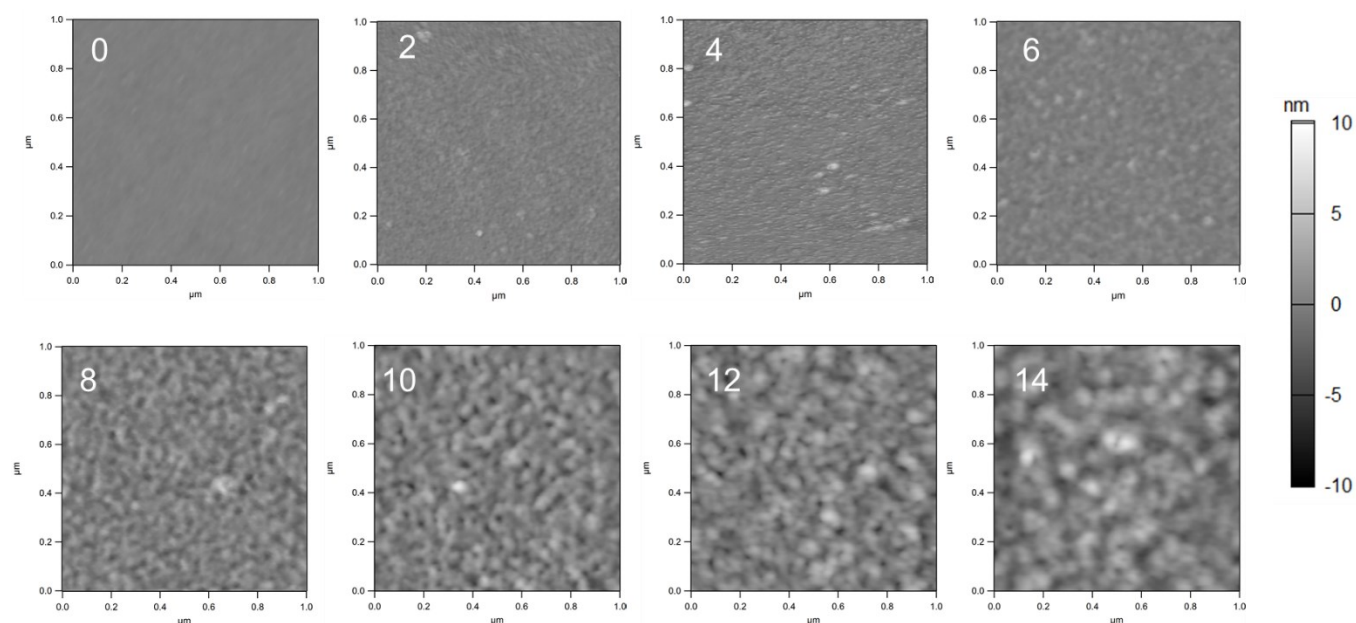

**Figure S4.** AFM images showing 2D representations of PDADMA/PSS films built on Si wafers in 0.1 M NaCl. Bare silicon, 2,4,6,8,10,12,14 layers. 1  $\mu\text{m}$  x 1  $\mu\text{m}$  scan area.

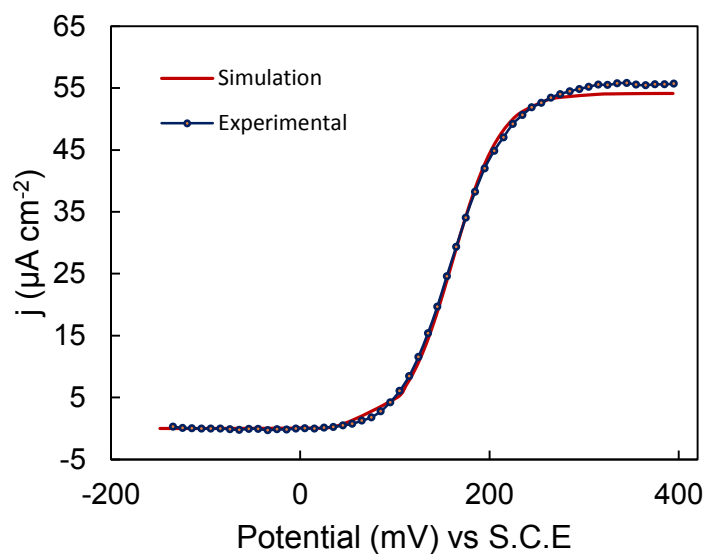

**Figure S5.** Experimental and simulated voltammograms at the bare electrode. The simulated voltammogram was generated using equation 3 assuming the diffusion coefficients of

ferrocyanide and ferricyanide are the same (main manuscript) with 0.10 mM redox probe, 25 °C temperature, 1000 rpm rotation rate, diffusion coefficient  $D = 7 \times 10^{-6} \text{ cm}^2 \text{ s}^{-1}$ , kinematic viscosity  $\nu = 0.0089 \text{ cm}^2 \text{ s}^{-1}$  and electrode area =  $0.126 \text{ cm}^2$

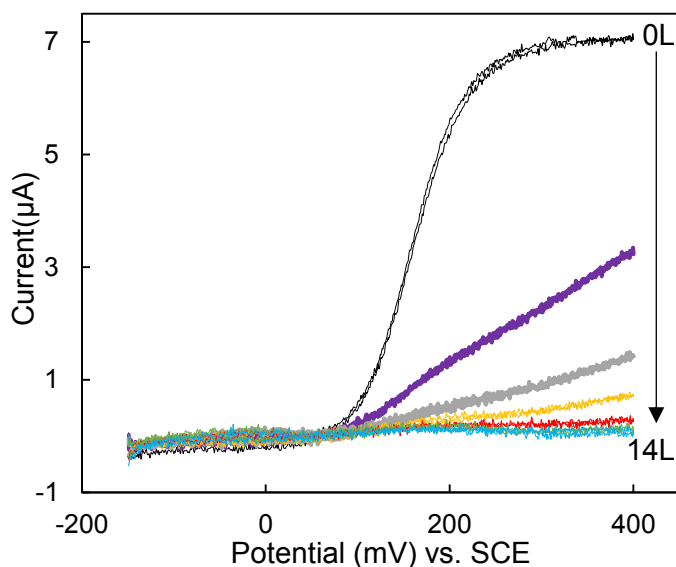

**Figure S6.** Cyclic voltammograms of 0.10 mM ferrocyanide in 0.1 M NaCl on PDADMA/PSS films at the Pt RDE. 25 °C,  $10 \text{ mV s}^{-1}$  sweep rate, and 1000 rpm rotation rate. Forward and reverse scans are shown (and almost overlap). The background on bare Pt, corresponding to charging current, was subtracted.

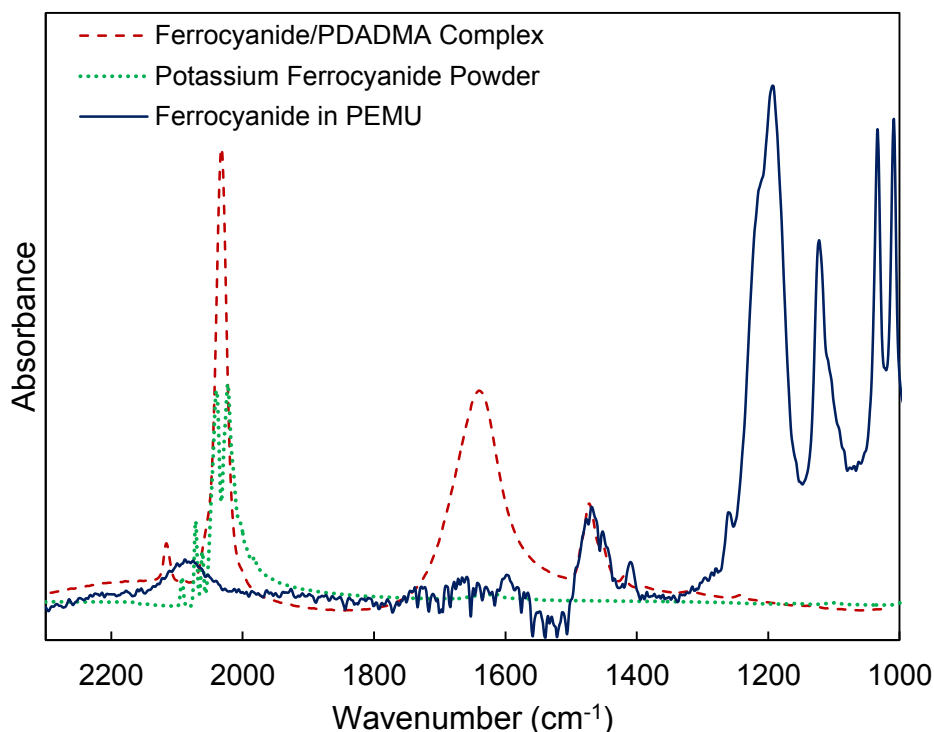

**Figure S7.** IR spectra normalized to the PDADMA band ( $1430\text{--}1530\text{ cm}^{-1}$ ) of ferrocyanide/PDADMA complex as a reference (1:4 molar ratio, dashed red line), potassium ferrocyanide powder (dotted green line) and 32 nm PEMU film in 0.1 mM ferrocyanide in 0.1 M NaCl (solid blue line). Ferrocyanide peak is between  $1980\text{ and }2100\text{ cm}^{-1}$ . All samples were measured on double-side-polished Si wafers. Room temperature.

The concentration of ferrocyanide was estimated as follows:

The density of the PEMU is  $1.1\text{ g mL}^{-1}$  with a water content of 40 wt% and a polymer content of 60 wt%. Thus, the film contains  $660\text{ g L}^{-1}$  of polymer. The molecular weight of the PDADMA:PSS  $\text{Pol}^+\text{Pol}^-$  repeat unit is  $310\text{ g mol}^{-1}$ . Thus, the concentration of  $\text{Pol}^+\text{Pol}^-$  is 2.1 M. Comparing the peak areas for ferrocyanide to PDADMA the molar ratio of ferrocyanide to PDADMA ( $\text{Pol}^+$ ) is 0.015 which yields a 0.032 M concentration of ferrocyanide and an average separation of 3.7 nm.

The ferricyanide concentration was determined in a similar manner using the PDADMA/ferricyanide as a standard and a thicker multilayer. The data have more uncertainty because the ferricyanide is in lower concentration than that of ferrocyanide.

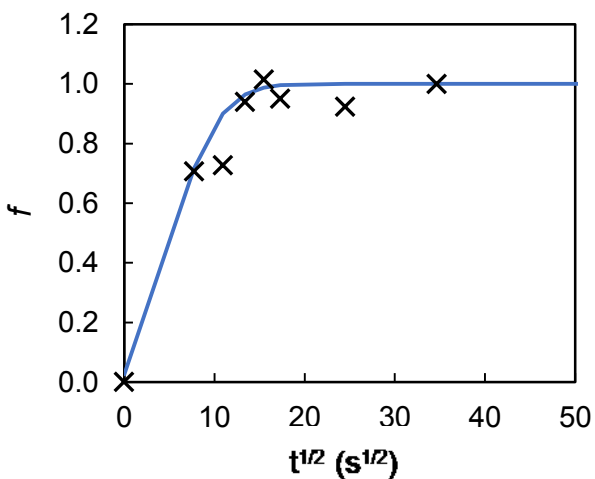

**Figure S8.** Room temperature doping in a 99 nm PDADMA/PSS PEMU as a function of time from 0.1 mM ferricyanide in 0.1 M NaCl. The solid line is a fit to equation 8 with a  $D_f$  of  $7 \times 10^{-13} \text{ cm}^2 \text{ s}^{-1}$ . The equilibrium concentration of ferricyanide in the PEMU is 0.0024 M. Error in  $f$  is +/- 15%
